# Supplementary material for: Prostate Cancer Incidence and Aggressiveness in Appalachia versus Non-Appalachia Populations in Pennsylvania by Urban-Rural Regions, 2004–2014
Source: Oxford University Press journal article supplement (doi:10.1158/1055-9965.epi-19-1232), 2020-04-10
Supplement: 10559965epi191232-sup-230110_2_supp_6179165_q7nr9q.docx [file 10559965epi191232-sup-230110_2_supp_6179165_q7nr9q.docx]

**Supplementary Table 1. Multivariable Poisson Regression of Prostate Cancer and More Aggressive Prostate Cancer at Diagnosis, 2004-2014**

| **Variables** | **Prostate Cancer Incidence RR (95% CI)** | **More Aggressive Prostate Cancer Incidence RR (95% CI)** |
| --- | --- | --- |
| **Age at Diagnosis in Years** |  |  |
| 40-49 | **Reference** | **Reference** |
| 50-59 | 8.46 (7.90, 9.08) | 9.37 (8.16, 10.82) |
| 60-69 | 22.67 (21.17, 24.31) | 28.09 (24.51, 3.36) |
| 70+ | 22.85 (21.35, 24.48) | 36.72 (32.13, 42.20) |
| **Race** |  |  |
| White | **Reference** | **Reference** |
| Black | 1.64 (1.57, 1.72) | 1.93 (1.79, 2.08) |
| Other/Unknown | 2.57 (2.41, 2.73) | 2.24 (1.98, 2.51) |
| **Geographical Region** |  |  |
| Urban Non-Appalachia | **Reference** | **Reference** |
| Rural Appalachia | 0.96 (0.92, 1.00) | 0.93 (0.86, 1.01) |
| Urban Appalachia | 0.95 (0.92, 0.98) | 1.02 (0.97, 1.08) |
| **Year at Diagnosis** |  |  |
| 2004 | **Reference** | **Reference** |
| 2005 | 1.06 (0.99, 1.14) | 1.09 (0.96, 1.23) |
| 2006 | 1.23 (1.16, 1.32) | 1.27 (1.13, 1.43) |
| 2007 | 1.27 (1.19, 1.36) | 1.24 (1.10, 1.40) |
| 2008 | 1.10 (1.03, 1.17) | 1.11 (0.99, 1.26) |
| 2009 | 1.04 (0.97, 1.11) | 1.08 (0.96, 1.22) |
| 2010 | 1.05 (0.98, 1.12) | 1.17 (1.04, 1.31) |
| 2011 | 1.05 (0.99, 1.12) | 1.21 (1.08, 1.37) |
| 2012 | 0.82 (0.77, 0.88) | 1.01 (0.89, 1.14) |
| 2013 | 0.78 (0.73, 0.84) | 1.03 (0.92, 1.17) |
| 2014 | 0.69 (0.64, 0.74) | 1.00 (0.88, 1.12) |

Note: RR= rate ratio and CI= confidence interval.
